# Supplementary material for: ‘Give Us The Tools!’: development of knowledge transfer tools to support the involvement of patient partners in the development of clinical trial protocols with patient-reported outcomes (PROs), in accordance with SPIRIT-PRO Extension
Source: PubMed Central journal article supplement — BMJ Open. 2021 Jun 30;11(6):e046450. doi: 10.1136/bmjopen-2020-046450 (PMC8246365; doi:10.1136/bmjopen-2020-046450), 2021-06-30
Supplement: bmjopen-2020-046450supp001.pdf [file bmjopen-2020-046450supp001.pdf]

## University of Birmingham CPROR PRO Learn resource for patient advocates involved in co-production of research or review

Patient-reported outcomes (PROs), such as health-related quality of life (HRQOL), symptoms or health status, are reported directly by the patient and provide a systematic way of measuring patients' views about the impact of disease and treatment on their health and well-being. For more information for those new to PROs:

[www.birmingham.ac.uk/research/activity/applied-health/research/prolearn](http://www.birmingham.ac.uk/research/activity/applied-health/research/prolearn)

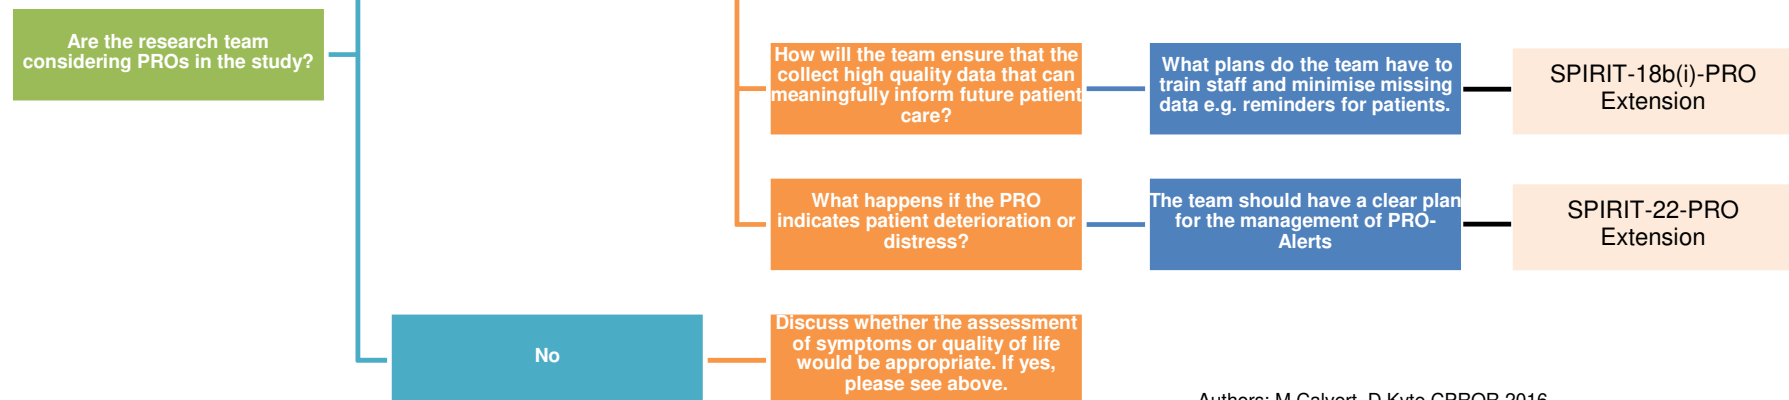

Authors: M.Calvert, D.Kyte CPROR 2016
